# Supplementary material
Source: PubMed Central journal article supplement (PMC3350218)

## Supporting Information

Imidazolopiperazines: Lead optimization of the second generation antimalarial agents

Nagle, Advait<sup>1±</sup>; Wu, Tao<sup>1±</sup>; Kuhlen, Kelli<sup>1</sup>; Gagaring, Kerstin<sup>1</sup>; Borboa, Rachel<sup>1</sup>; Francek, Caroline<sup>1</sup>; Chen, Zhong<sup>1</sup>; Plouffe, David<sup>1</sup>; Lin, Xuena<sup>2</sup>; Caldwell, Christopher<sup>2</sup>; Ek, Jared<sup>1</sup>; Skolnik, Suzanne<sup>2</sup>; Liu, Fenghua<sup>2</sup>; Wang, Jianling<sup>2</sup>; Chang, Jonathan<sup>1</sup>; Li, Chun<sup>1</sup>; Liu, Bo<sup>1</sup>; Hollenbeck, Thomas<sup>1</sup>; Tuntland, Tove<sup>1</sup>; Isbell, John<sup>1</sup>; Chuan, Tiffany<sup>1</sup>; Alper, Philip B.<sup>1</sup>; Fischli, Christoph<sup>3,4</sup>; Brun, Reto<sup>3,4</sup>; Lakshminarayana, Suresh B.<sup>5</sup>; Rottmann, Matthias<sup>3,4</sup>; Diagana, Thierry T.<sup>5</sup>; Winzeler, Elizabeth A.<sup>1</sup>; Glynn, Richard<sup>1</sup>; Tully, David C.<sup>1</sup>; Chatterjee, Arnab K.<sup>1\*</sup>

<sup>1</sup> Genomics Institute of the Novartis Research Foundation, 10675 John Jay Hopkins Dr., San Diego, CA 92121 USA.

<sup>2</sup> Novartis Institute for Biomedical Research, Preclinical Profiling Group, Cambridge, MA

<sup>3</sup> Swiss Tropical and Public Health Institute, Parasite Chemotherapy, CH-4002 Socinstrasse 57, Basel, Switzerland CD-4002.

<sup>4</sup> University of Basel, CH-4003 Basel, Switzerland

<sup>5</sup> Novartis Institute for Tropical Diseases, 10 Biopolis Road, #05-01 Chromos, Singapore-138670.

\*To whom correspondence should be addressed. Phone, 858-332-4751; e-mail, akc@gnf.org.

**Supporting Information:**Supporting information Table 1. *In vitro* ADME of selected analogs

| Entry     | Log P<br>(calculated) | Polar<br>surface<br>area<br>(PSA) | PAMPA<br>(%<br>Absorbed) | Caco-2<br>A-B<br>(cm/sec<br>$\times 10^6$ ) | Caco-2<br>B-A<br>(cm/se<br>$c \times 10^6$ ) | Ratio<br>Caco-2<br>A-B/B-<br>A |
|-----------|-----------------------|-----------------------------------|--------------------------|---------------------------------------------|----------------------------------------------|--------------------------------|
| <b>15</b> | 3.22                  | 76.18                             | 52                       | 0.70                                        | 2.55                                         | 0.27                           |
| <b>22</b> | 4.26                  | 76.18                             | 51.8                     | 1.26                                        | 2.99                                         | 0.42                           |
| <b>24</b> | 4.34                  | 76.18                             | 51.5                     | 0.61                                        | 1.3                                          | 0.47                           |
| <b>27</b> | 3.84                  | 76.18                             | 81                       | 3.05                                        | 8.38                                         | 0.36                           |
| <b>28</b> | 4.88                  | 76.18                             | 99.5                     | 1.2                                         | 0.97                                         | 1.24                           |
| <b>29</b> | 5.2                   | 76.18                             | 99.5                     | 3.5                                         | 2.37                                         | 1.48                           |
| <b>31</b> | 4.47                  | 41.88                             | 99.5                     | 8.2                                         | 2.36                                         | 3.47                           |
| <b>32</b> | 3.86                  | 58.95                             | 80.9                     | 15                                          | 14.37                                        | 1.04                           |
| <b>33</b> | 4.89                  | 58.95                             | n.t                      | n.t                                         | n.t                                          |                                |
| <b>34</b> | 5.29                  | 58.95                             | 97.1                     | 3.22                                        | 3.35                                         | 0.96                           |
| <b>35</b> | 5.5                   | 41.88                             | 99.9                     | 15.56                                       | 6.96                                         | 2.24                           |
| <b>36</b> | 5.18                  | 41.88                             | 99.9                     | n.t                                         | n.t                                          |                                |

### Pampa (%absorbed) vs. Log P

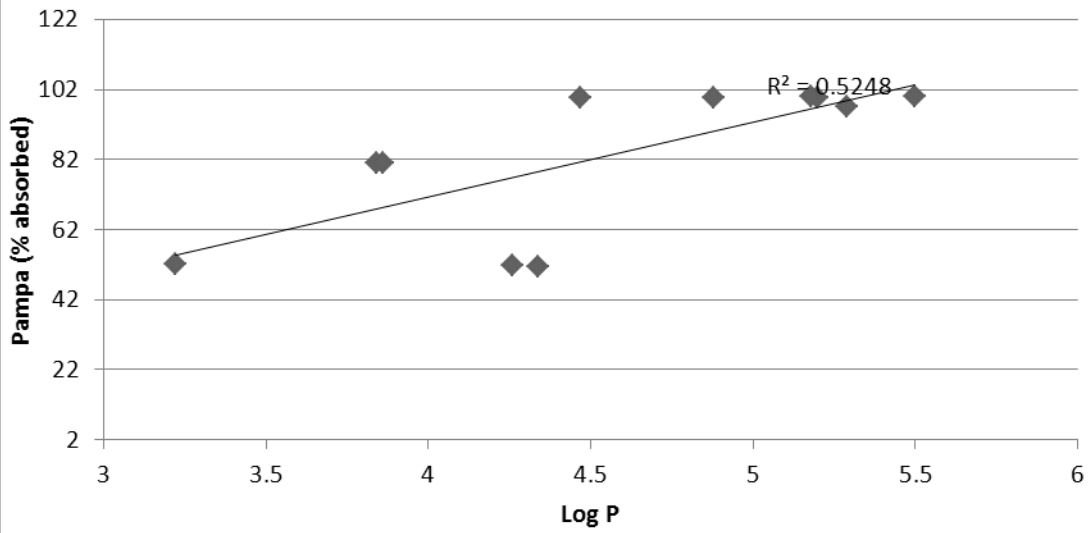

### Caco-2 (A-B) vs. log P

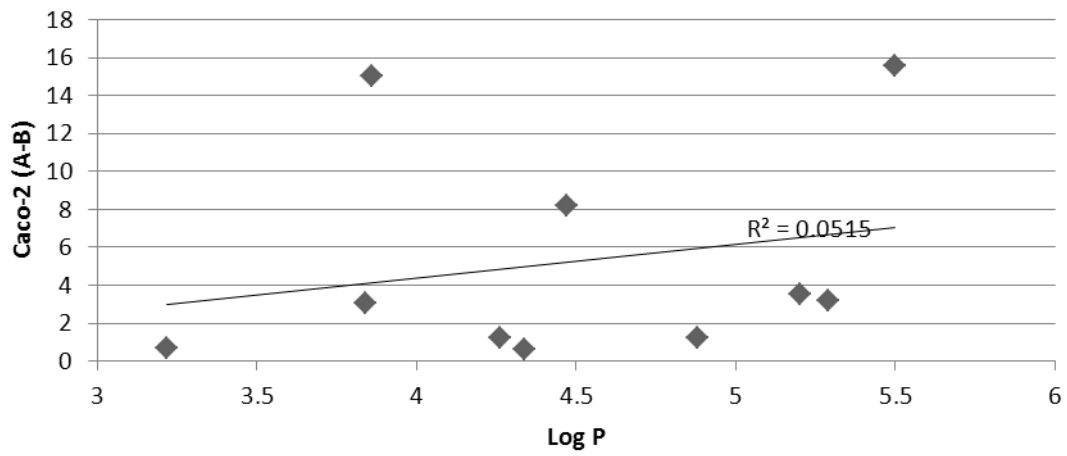

### Caco-2 A-B/B-A ratio vs Log P

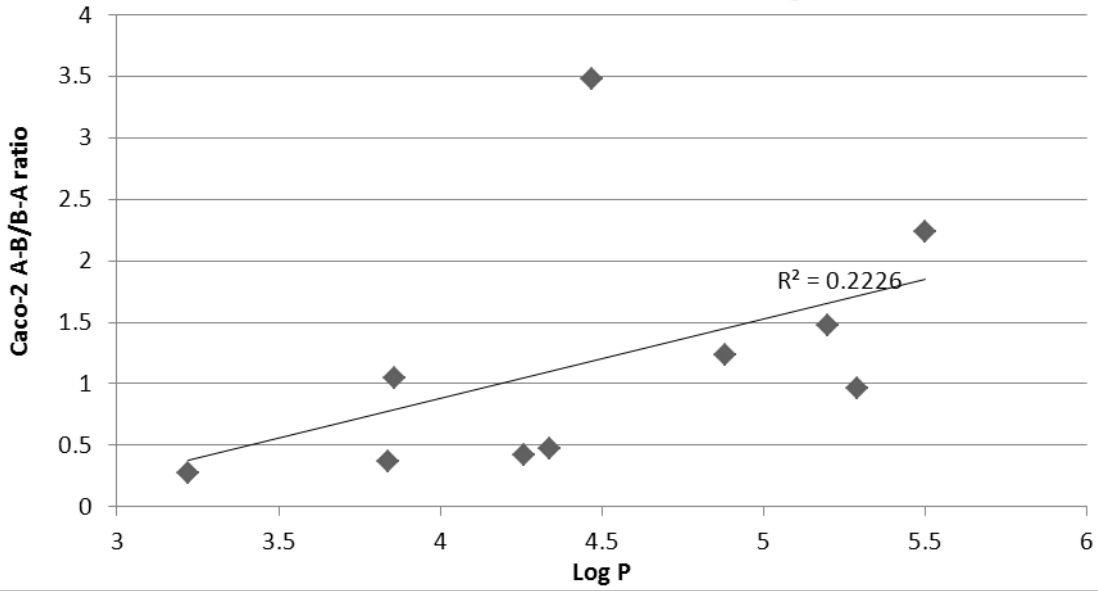

### Caco-2 (B-A) vs. Log P

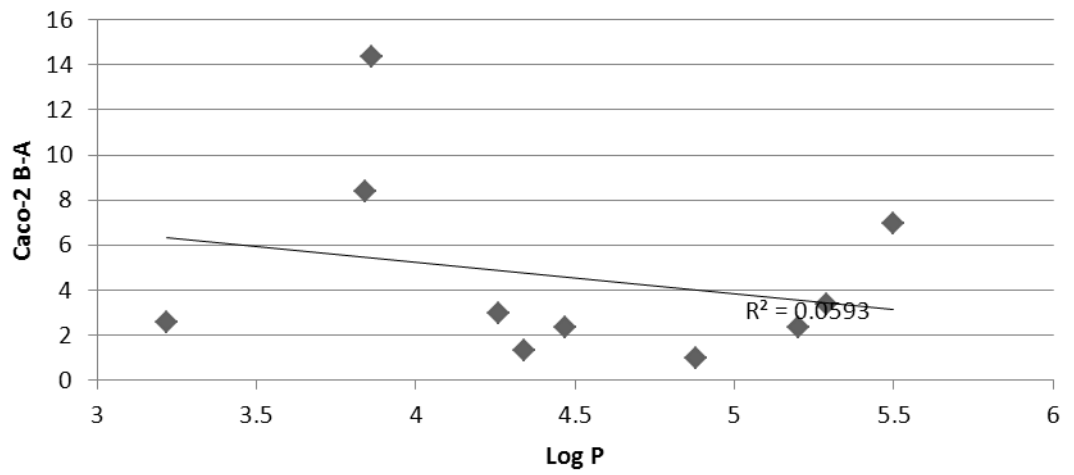

### Pampa (%absorbed) vs. Log P



### Caco-2 (A-B) vs. log P



### Caco-2 A-B/B-A ratio vs Log P



### Caco-2 (B-A) vs. Log P



Supplement: jm300041e_si_001.pdf [file jm300041e_si_001.pdf]
